# Supplementary material for: Seeding selectivity and ultrasensitive detection of tau aggregate conformers of Alzheimer disease
Source: Springer Nature journal article supplement (doi:10.1007/s00401-018-1947-3), 2018-12-20
Supplement: MOESM1 [file 16355782]

**Supplementary material for**

Seeding selectivity and ultrasensitive detection of tau aggregate conformers of Alzheimer disease

*Acta Neuropathologica*

Allison Kraus<sup>1\*</sup>, Eri Saijo<sup>1\*</sup>, Michael A. Metrick II.<sup>1\*</sup>, Kathy Newell<sup>2</sup>, Christina J. Sigurdson<sup>3</sup>, Gianluigi Zanusso<sup>4</sup>, Bernardino Ghetti<sup>5</sup> and Byron Caughey<sup>1#</sup>

<sup>1</sup>LPVD, Rocky Mountain Laboratories, NIAID, NIH, Hamilton, MT 59840 USA.

<sup>2</sup> Department of Pathology and Laboratory Medicine, University of Kansas School of Medicine, Kansas City, KS, USA

<sup>3</sup> Department of Pathology, UC San Diego, La Jolla, CA, USA

<sup>4</sup> University of Verona, Verona, Italy.

<sup>5</sup> Indiana University School of Medicine, Indianapolis, IN, USA

\*These authors contributed equally.

#Corresponding author: [bcaughey@nih.gov](mailto:bcaughey@nih.gov); TEL: +1 406 363 9264; FAX: +1 406 363 9286

Online Resource Table 1.

| Tauopathy<br>classific.                                       | 1° (2°, 3°, 4°) Diagnosis                                            | Brain<br>region | Sex | AOD | PMI<br>(Hrs) | Brain<br>Wt.(g) | Braak<br>score | tau RT-QuIC seed concentration (log SD <sub>50</sub> /mg tissue) ± SE |           |            |          |          | Average ±<br>SD | inter-<br>assay<br>CV |
|---------------------------------------------------------------|----------------------------------------------------------------------|-----------------|-----|-----|--------------|-----------------|----------------|-----------------------------------------------------------------------|-----------|------------|----------|----------|-----------------|-----------------------|
|                                                               |                                                                      |                 |     |     |              |                 |                | Expt 1                                                                | Expt 2    | Expt 3     | Expt 4   | Expt 5   |                 |                       |
| 3R/4R                                                         | sAD 1 <sup>a</sup>                                                   | F               | M   | 58  | 13           | NA              | VI             | 9.00±0.29                                                             | 8.75±0.38 | 8.75±0.38  | -        | -        | 8.83±0.14       | 0.016                 |
|                                                               | sAD 2 <sup>a</sup>                                                   | F               | F   | 80  | 26           | 1007            | VI             | 9.00±0.41                                                             | 8.50±0.46 | 8.50±0.35  | -        | -        | 8.67±0.29       | 0.033                 |
|                                                               | sAD 3 <sup>a</sup>                                                   | F               | M   | 70  | 9            | 1390            | VI             | 7.75±0.25                                                             | 7.75±0.46 | 7.75±0.25  | -        | -        | 7.75±0          | 0.000                 |
|                                                               | sAD 4 <sup>a</sup>                                                   | F               | F   | 72  | 24           | U               | VI             | 7.50±0                                                                | 7.25±0.25 | 10.00±0.36 | 7.50±0   | 8.0±0.29 | 8.05±1.12       | 0.140                 |
|                                                               | sAD 5 <sup>a</sup>                                                   | F               | M   | 80  | 30           | U               | VI             | 8.75±0.38                                                             | 8.50±0.29 | 7.50±0     | -        | -        | 8.25±0.66       | 0.080                 |
|                                                               | sAD 6 <sup>a</sup>                                                   | F               | F   | 76  | 24           | U               | VI             | 9.75±0.46                                                             | 9.25±0.46 | 8.00±0.25  | 8.5±0.38 | -        | 8.88±0.78       | 0.088                 |
|                                                               | sAD 7 (CM) <sup>b</sup>                                              | Cx              | M   | 80  | 3            | 1000            | VI             | 8.50±0                                                                | -         | -          | -        | -        | 8.50            |                       |
|                                                               | sAD 8 (CM) <sup>b</sup>                                              | Cx              | F   | 78  | 2            | 750             | VI             | 8.50±0.35                                                             | -         | -          | -        | -        | 8.50            |                       |
|                                                               | sAD 9 (CAA) (regional neuropath, same brain as CAA 9) <sup>c</sup>   | F               | F   | 73  | 16.3         | 1110            | VI             | 9.25±0.25                                                             | 9.25±0.25 | -          | -        | -        | 9.25±0          | 0.000                 |
|                                                               | sAD 10 (CAA) (regional neuropath, same brain as CAA 10) <sup>c</sup> | F               | M   | 85  | 9.6          | 1300            | V              | 8.25±0.38                                                             | -         | -          | -        | -        | 8.25            |                       |
|                                                               | sAD 11 <sup>a</sup>                                                  | F               | F   | 82  | 19           | 1049            |                | 7.50±0.36                                                             | 8.00±0.29 | 8.25±0.43  | -        | -        | 7.92±0.38       | 0.048                 |
|                                                               |                                                                      |                 |     |     |              |                 |                |                                                                       |           |            |          |          |                 |                       |
|                                                               | fAD-A431E 1 <sup>a</sup>                                             | F               | M   | 44  | U            | U               |                | 9.25±0.54                                                             | 9.25±0.38 | 10.00±0.38 | -        | -        | 9.5±0.43        | 0.046                 |
|                                                               | fAD-A431E 2 <sup>a</sup>                                             | F               | F   | 43  | 4            | U               |                | 10.00±0.36                                                            | 8.75±0.25 | 9.25±0.38  | -        | -        | 9.33±0.63       | 0.067                 |
|                                                               | fAD-A431E 3 <sup>a</sup>                                             | F               | U   | U   | U            | U               |                | 9.50±0.48                                                             | 8.50±0    | -          | -        | -        | 9±0.71          | 0.079                 |
|                                                               | fAD-L435F 4 <sup>d</sup>                                             | PPC             | F   | 56  | 12           | 926             | VI             | 9.45±0.25                                                             | -         | -          | -        | -        | 9.45            |                       |
|                                                               | fAD-A431E 5 <sup>d</sup>                                             | PPC             | F   | 55  | 8            | 720             | VI             | 9.50±0                                                                | -         | -          | -        | -        | 9.50            |                       |
|                                                               |                                                                      |                 |     |     |              |                 |                |                                                                       |           |            |          |          |                 |                       |
|                                                               | CTE 1 (DLB) <sup>c</sup>                                             | T               | M   | 78  |              | 1480            |                | 7.00±0.5                                                              | 7.00±0.46 | -          | -        | -        | 7.00±0          | 0.000                 |
|                                                               | CTE 2 <sup>c</sup>                                                   | T               | M   | 67  |              | 1240            |                | 7.25±0.25                                                             | 7.75±0.38 | -          | -        | -        | 7.50±0.35       | 0.047                 |
|                                                               |                                                                      |                 |     |     |              |                 |                |                                                                       |           |            |          |          |                 |                       |
|                                                               | PART 1 (LBD, CVD) <sup>a</sup>                                       | T               | F   | 77  | 3.5          | 1063            | N/A            | 6.50±0.35                                                             | -         | -          | -        | -        | 6.50            |                       |
|                                                               | PART 2 (ALS, CVD) <sup>a</sup>                                       | T               | M   | 62  | 3.5          | 1447            | N/A            | 6.00±0.35                                                             | -         | -          | -        | -        | 6.00            |                       |
| PART 3 (small vessel disease, TDP43, CVD) <sup>a</sup>        | T                                                                    | M               | 65  | 4.5 | 1103         | N/A             | 5.50±0.35      | 5.50±0.41                                                             | -         | -          | -        | 5.50±0   | 0.00            |                       |
| PART 4 (regional neuropath, same brain as CAA 4) <sup>c</sup> | T                                                                    | F               | 88  | 7.9 | 1140         |                 | 7.50±0         | -                                                                     | -         | -          | -        | 7.50     |                 |                       |
| CAA 4 (regional neuropath, same brain as PART 4) <sup>c</sup> | F                                                                    | F               | 88  | 7.9 | 1140         |                 | 6.00±0.29      | -                                                                     | -         | -          | -        | 6.00     |                 |                       |
|                                                               |                                                                      |                 |     |     |              |                 |                |                                                                       |           |            |          |          |                 |                       |
| ND 05-12 (CAA) <sup>b</sup>                                   | Cx                                                                   | F               | 88  | 2   | 1160         | III             | 5.75±0.56      | -                                                                     | -         | -          | -        | 5.75     |                 |                       |
| ND 06-15 <sup>b</sup>                                         | Cx                                                                   | F               | 87  | 3   | 1260         | III             | 6.50±0.54      | -                                                                     | -         | -          | -        | 6.50     |                 |                       |
| ND 03-41 (CWMR) <sup>b</sup>                                  | Cx                                                                   | M               | 89  | 3   | 1440         | II              | 4.25±0         | -                                                                     | -         | -          | -        | 4.25     |                 |                       |
| ND 06-21 <sup>b</sup>                                         | Cx                                                                   | F               | 73  | 3   | 1240         | II              | 5.00±0.29      | -                                                                     | -         | -          | -        | 5.00     |                 |                       |
|                                                               |                                                                      |                 |     |     |              |                 |                |                                                                       |           |            |          |          |                 |                       |
| 4R                                                            | PSP 3 (CVD) <sup>a</sup>                                             | F               | M   | 65  | 8            | 1175            |                | 5.25±0.38                                                             | 5.50±0.38 | -          | -        | -        | 5.38±0.18       | 0.033                 |
|                                                               | PSP 4 (SC) <sup>a</sup>                                              | F               | M   | 67  | 4            | 1480            |                | 6.25±0.25                                                             | 5.75±0.25 | -          | -        | -        | 6±0.35          | 0.059                 |
|                                                               | PSP 5 (CVD) <sup>a</sup>                                             | F               | M   | 76  | 6            | 1381            |                | 4.25±0.25                                                             | 4.25±0.25 | -          | -        | -        | 4.25±0          | 0.000                 |
|                                                               |                                                                      |                 |     |     |              |                 |                |                                                                       |           |            |          |          |                 |                       |
|                                                               | CBD 1 <sup>a</sup>                                                   | F               | F   | 51  | 10           | U               |                | 6.00±0.29                                                             | 5.50±0.36 | -          | -        | -        | 5.75±0.35       | 0.061                 |
|                                                               | CBD 3 (CVD) <sup>a</sup>                                             | F               | M   | 65  | 17           | 1200            |                | 6.50±0                                                                | 6.75±0.36 | -          | -        | -        | 6.63±0.18       | 0.027                 |
|                                                               |                                                                      |                 |     |     |              |                 |                |                                                                       |           |            |          |          |                 |                       |
|                                                               | AGD 1 (CVD) <sup>a</sup>                                             | F               | M   | 91  | 2            | 1175            |                | 5.75±0.25                                                             | 6.25±0.38 | -          | -        | -        | 6±0.35          | 0.059                 |
|                                                               | AGD 2 (HS) <sup>a</sup>                                              | F               | M   | 86  | 110          | 1330            |                | 5.50±0.25                                                             |           |            |          |          | 5.5             |                       |
|                                                               |                                                                      |                 |     |     |              |                 |                |                                                                       |           |            |          |          |                 |                       |
| FTDP-17 (MAPT) 3 <sup>a</sup>                                 | F                                                                    | F               | 54  | 11  | 1122         |                 | 6.00±0.29      | 4.75±0.29                                                             | 6.25±0.25 | -          | -        | 5.67±0.8 | 0.142           |                       |

|                                                                                                                                                                                                                                                 |                                                               |   |    |     |      |      |           |           |           |           |           |      |            |       |
|-------------------------------------------------------------------------------------------------------------------------------------------------------------------------------------------------------------------------------------------------|---------------------------------------------------------------|---|----|-----|------|------|-----------|-----------|-----------|-----------|-----------|------|------------|-------|
| 3R                                                                                                                                                                                                                                              | PiD 1 (CVD) <sup>a</sup>                                      | F | M  | 56  | 9    | 1032 |           | 6.25±0.25 | 5.50±0.29 | -         | -         | -    | 5.88±0.53  | 0.090 |
|                                                                                                                                                                                                                                                 | PiD 2 (β-amyloid pathology, CVD) <sup>a</sup>                 | F | M  | 64  | 3    | 1003 |           | 8.00±0.46 | 6.25±0.25 | 5.75±0.25 | -         | -    | 6.67±1.12  | 0.177 |
|                                                                                                                                                                                                                                                 | PiD 4 <sup>a</sup>                                            | F | M  | 70  | U    | U    |           | 5.00±0.29 | -         | -         | -         | -    | 5          |       |
| IHC no tau                                                                                                                                                                                                                                      | PD 1 <sup>e</sup>                                             | F | M  | 73  | U    | U    |           | 5.25±0.25 | 5.50±0.29 | -         | -         | -    | 5.38±0.18  | 0.033 |
|                                                                                                                                                                                                                                                 | PD 2 <sup>e</sup>                                             | F | M  | 61  | U    | U    |           | 4.25±0.25 | 5.50±0.29 | 5.50±0.36 | -         | -    | 5.08±0.72  | 0.142 |
|                                                                                                                                                                                                                                                 | SC 1 <sup>a</sup>                                             | F | F  | 76  | 4    | 1240 |           | 5.00±0.29 | 5.50±0.36 | -         | -         | -    | 5.25±0.35  | 0.067 |
|                                                                                                                                                                                                                                                 | SC 3 <sup>a</sup>                                             | F | F  | 81  | 25   | 1100 |           | 5.25±0.38 | 6.00±0.29 | 4.75±0.25 | -         | -    | 5.33±0.63  | 0.118 |
|                                                                                                                                                                                                                                                 | CVD 1 <sup>a</sup>                                            | F | F  | 53  | 19   | 1192 |           | 3.75±0.25 | 4.50±0.35 | 4.50±0    | -         | -    | 4.25±0.43  | 0.102 |
|                                                                                                                                                                                                                                                 | CVD 3 (SC) <sup>a</sup>                                       | F | F  | 77  | 6    | 1112 |           | 3.50±0    | 4.00±0.29 | 4.50±0.29 | 2.75±0.25 | -    | 3.69±0.75  | 0.202 |
|                                                                                                                                                                                                                                                 | CVD 4 (SAH, SC) <sup>a</sup>                                  | F | F  | 86  | U    | 1050 |           | 5.50±0.41 | 2.50±0    | 5.25±0.38 | -         | -    | 4.42±1.66  | 0.377 |
|                                                                                                                                                                                                                                                 | DLBD 1 (SC, CVD) <sup>a</sup>                                 | F | M  | 80  | 12   | 1285 |           | 6.50±0    | 6.50±0.36 | 7.00±0.35 | -         | -    | 6.67±0.29  | 0.043 |
|                                                                                                                                                                                                                                                 | DLBD 4 (CVD, SC) <sup>a</sup>                                 | F | M  | 71  | 8    | 1395 |           | 5.25±0.36 | 5.25±0.25 | -         | -         | -    | 5.25       | 0.000 |
|                                                                                                                                                                                                                                                 | FTLD-TDP 1 (CVD) <sup>a</sup>                                 | F | F  | 50  | 6    | 754  |           | 5.25±0.25 | -         | -         | -         | -    | 5.25       |       |
|                                                                                                                                                                                                                                                 | FTLD-TDP-Type A 4 (CVD) <sup>a</sup>                          | F | F  | 65  | 5    | 886  |           | 3.25±0.25 | 4.75±0.38 | -         | -         | -    | 4±1.06     | 0.265 |
|                                                                                                                                                                                                                                                 | ALS 1 (SC, CVD) <sup>a</sup>                                  | F | M  | 72  | 2    | 1376 |           | 5.00±0.36 | 4.75±0.38 | -         | -         | -    | 4.875±0.18 | 0.36  |
|                                                                                                                                                                                                                                                 | CAA 9 (regional neuropath, same brain as AD 9) <sup>c</sup>   | C | F  | 73  | 16.3 | 1110 |           | 5.00±0.29 | -         | -         | -         | -    | 5.00       |       |
|                                                                                                                                                                                                                                                 | CAA 10 (regional neuropath, same brain as AD 10) <sup>c</sup> | C | M  | 85  | 9.6  | 1300 |           | 7.00±0.46 | -         | -         | -         | -    | 7.00       |       |
| CAA 4 (regional neuropath, same brain as PART 4) <sup>c</sup>                                                                                                                                                                                   | C                                                             | F | 88 | 7.9 | 1140 |      | 4.25±0.38 | -         | -         | -         | -         | 4.25 |            |       |
| tau KO                                                                                                                                                                                                                                          | Whole                                                         | U | U  | U   | U    |      |           |           |           |           |           |      |            |       |
| Neuropathological diagnoses were provided for the indicated cases by <sup>a</sup> Dr. Bernardino Ghetti, <sup>b</sup> Dr. Thomas G. Beach, <sup>c</sup> Dr. Kathy Newell, <sup>d</sup> Dr. Lawrence A. Hansen, <sup>e</sup> Dr. Roscoe Atkinson |                                                               |   |    |     |      |      |           |           |           |           |           |      |            |       |
| <i>Abbreviations:</i>                                                                                                                                                                                                                           |                                                               |   |    |     |      |      |           |           |           |           |           |      |            |       |
| <i>Brain region:</i>                                                                                                                                                                                                                            |                                                               |   |    |     |      |      |           |           |           |           |           |      |            |       |
| AGD, Argyrophilic grain disease                                                                                                                                                                                                                 |                                                               |   |    |     |      |      |           |           |           |           |           |      |            |       |
| AD, Alzheimer disease                                                                                                                                                                                                                           |                                                               |   |    |     |      |      |           |           |           |           |           |      |            |       |
| ALS, Amyotrophic lateral sclerosis                                                                                                                                                                                                              |                                                               |   |    |     |      |      |           |           |           |           |           |      |            |       |
| CAA, cerebral amyloid angiopathy                                                                                                                                                                                                                |                                                               |   |    |     |      |      |           |           |           |           |           |      |            |       |
| CM, cerebral malformation                                                                                                                                                                                                                       |                                                               |   |    |     |      |      |           |           |           |           |           |      |            |       |
| CVD, cerebrovascular disease                                                                                                                                                                                                                    |                                                               |   |    |     |      |      |           |           |           |           |           |      |            |       |
| CWMR, cerebral white matter rarefaction                                                                                                                                                                                                         |                                                               |   |    |     |      |      |           |           |           |           |           |      |            |       |
| DLBD, diffuse Lewy body disease                                                                                                                                                                                                                 |                                                               |   |    |     |      |      |           |           |           |           |           |      |            |       |
| FTDP-17, Frontotemporal dementia and parkinsonism linked to chromosome 17                                                                                                                                                                       |                                                               |   |    |     |      |      |           |           |           |           |           |      |            |       |
| FTLD-TDP, Frontotemporal lobar degeneration with TDP-43                                                                                                                                                                                         |                                                               |   |    |     |      |      |           |           |           |           |           |      |            |       |
| HS, Hippocampal sclerosis                                                                                                                                                                                                                       |                                                               |   |    |     |      |      |           |           |           |           |           |      |            |       |
| PD, Parkinson disease                                                                                                                                                                                                                           |                                                               |   |    |     |      |      |           |           |           |           |           |      |            |       |
| PiD, Pick disease                                                                                                                                                                                                                               |                                                               |   |    |     |      |      |           |           |           |           |           |      |            |       |
| PART, primary age-related tauopathy                                                                                                                                                                                                             |                                                               |   |    |     |      |      |           |           |           |           |           |      |            |       |
| PSP, progressive supranuclear palsy                                                                                                                                                                                                             |                                                               |   |    |     |      |      |           |           |           |           |           |      |            |       |
| SAH, sub-arachnoid hemorrhage                                                                                                                                                                                                                   |                                                               |   |    |     |      |      |           |           |           |           |           |      |            |       |
| SC, senile change                                                                                                                                                                                                                               |                                                               |   |    |     |      |      |           |           |           |           |           |      |            |       |
| AOD, age of death                                                                                                                                                                                                                               |                                                               |   |    |     |      |      |           |           |           |           |           |      |            |       |
| N/A, non-applicable                                                                                                                                                                                                                             |                                                               |   |    |     |      |      |           |           |           |           |           |      |            |       |
| tau KO, human and mouse tau knockout mouse                                                                                                                                                                                                      |                                                               |   |    |     |      |      |           |           |           |           |           |      |            |       |
| U, unavailable                                                                                                                                                                                                                                  |                                                               |   |    |     |      |      |           |           |           |           |           |      |            |       |
| PMI, post-mortem interval                                                                                                                                                                                                                       |                                                               |   |    |     |      |      |           |           |           |           |           |      |            |       |
| F, frontal cortex                                                                                                                                                                                                                               |                                                               |   |    |     |      |      |           |           |           |           |           |      |            |       |
| T, temporal cortex                                                                                                                                                                                                                              |                                                               |   |    |     |      |      |           |           |           |           |           |      |            |       |
| C, cerebellum                                                                                                                                                                                                                                   |                                                               |   |    |     |      |      |           |           |           |           |           |      |            |       |
| Cx, cortex                                                                                                                                                                                                                                      |                                                               |   |    |     |      |      |           |           |           |           |           |      |            |       |
| H, hippocampus                                                                                                                                                                                                                                  |                                                               |   |    |     |      |      |           |           |           |           |           |      |            |       |
| PPC, precuneus/posterior cingulate cortex                                                                                                                                                                                                       |                                                               |   |    |     |      |      |           |           |           |           |           |      |            |       |

## Online Resource Fig 1.

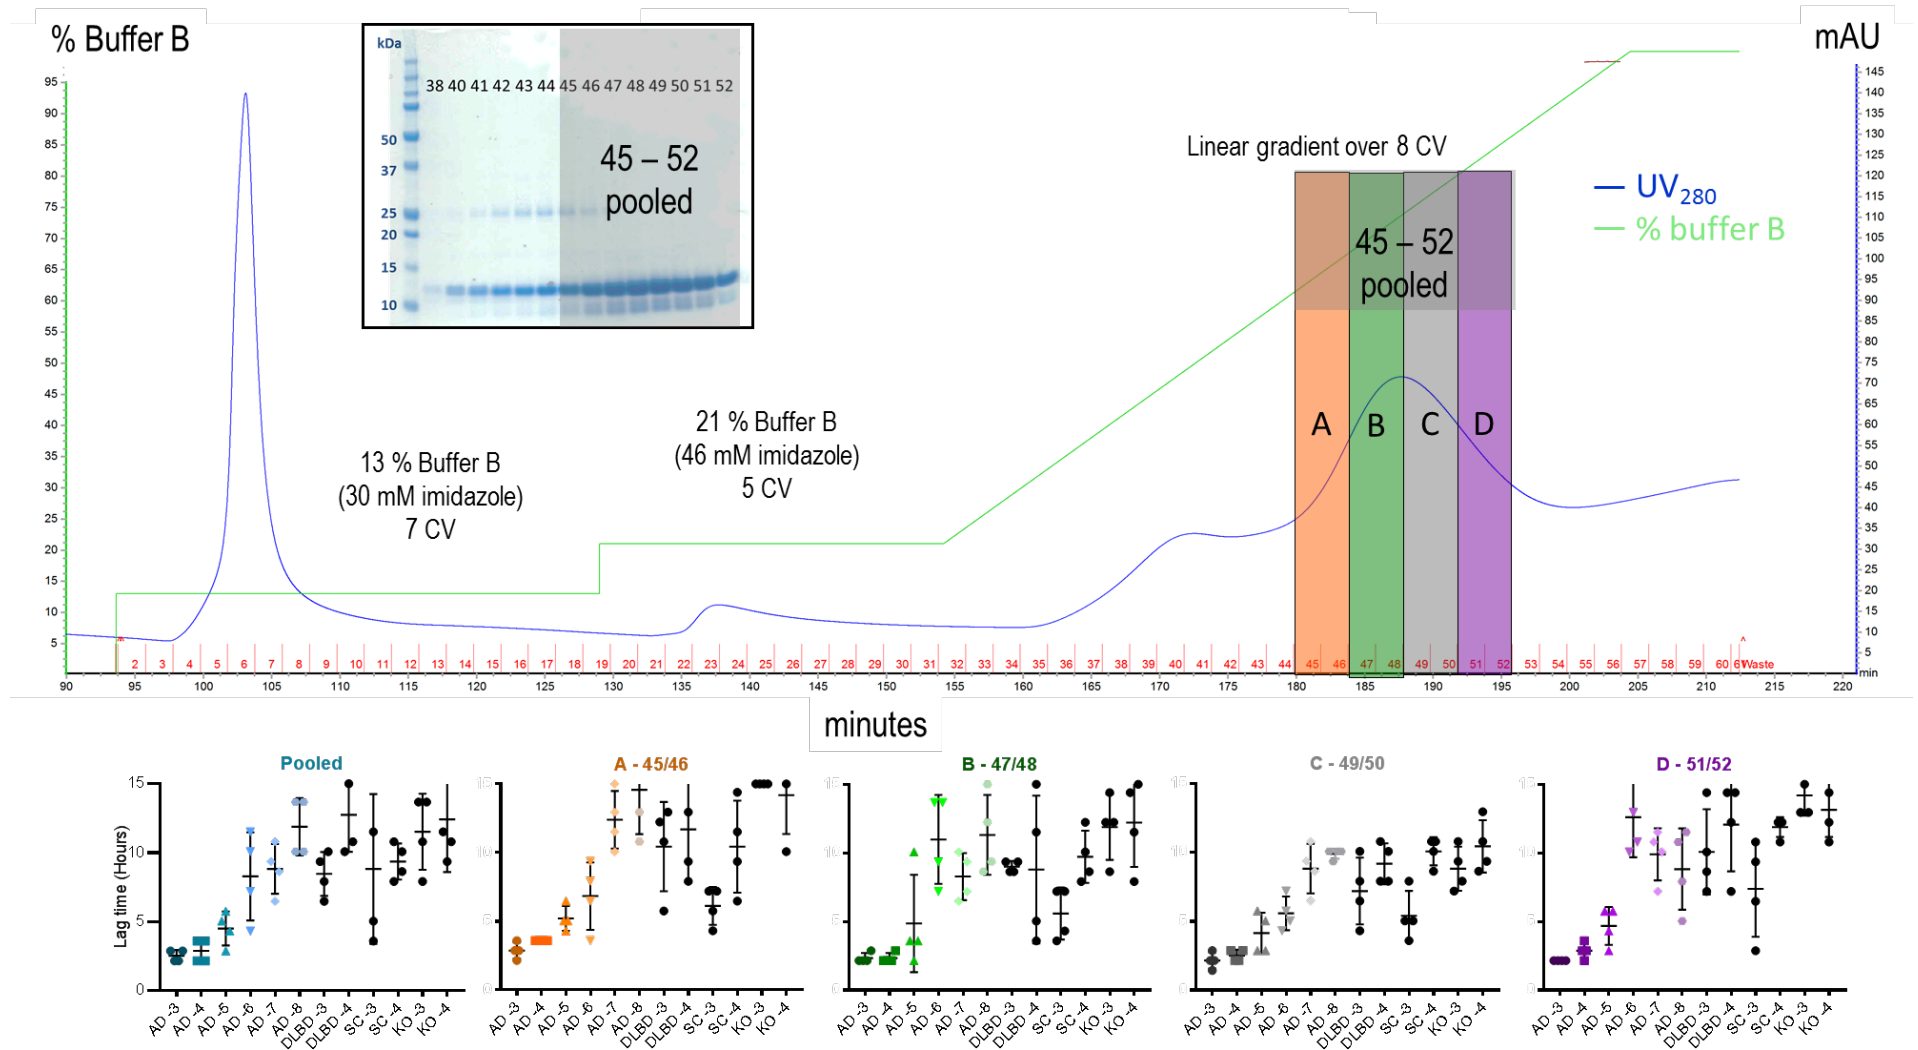

**Online Resource Fig 1. Purification of AD RT-QuIC assay ready  $\tau$ 306 substrate.** Contaminants of the AD RT-QuIC are eluted from the FF His column with two steps of 13% and 21% buffer B prior to elution of  $\tau$ 306 over a linear gradient of 21% to 100% buffer B over 8 column volumes. Fractions of  $\tau$ 306 were tested in a 384 well plate for the reproducibility and sensitivity of AD detection. Based on this and the purity of the substrate assessed by Coomassie blue gel analysis (inset), fractions 45-52 were pooled, precipitated with acetone before guanidine monomerization and size-exclusion desalting to yield pure monomeric  $\tau$ 306.

## Online Resource Fig 2

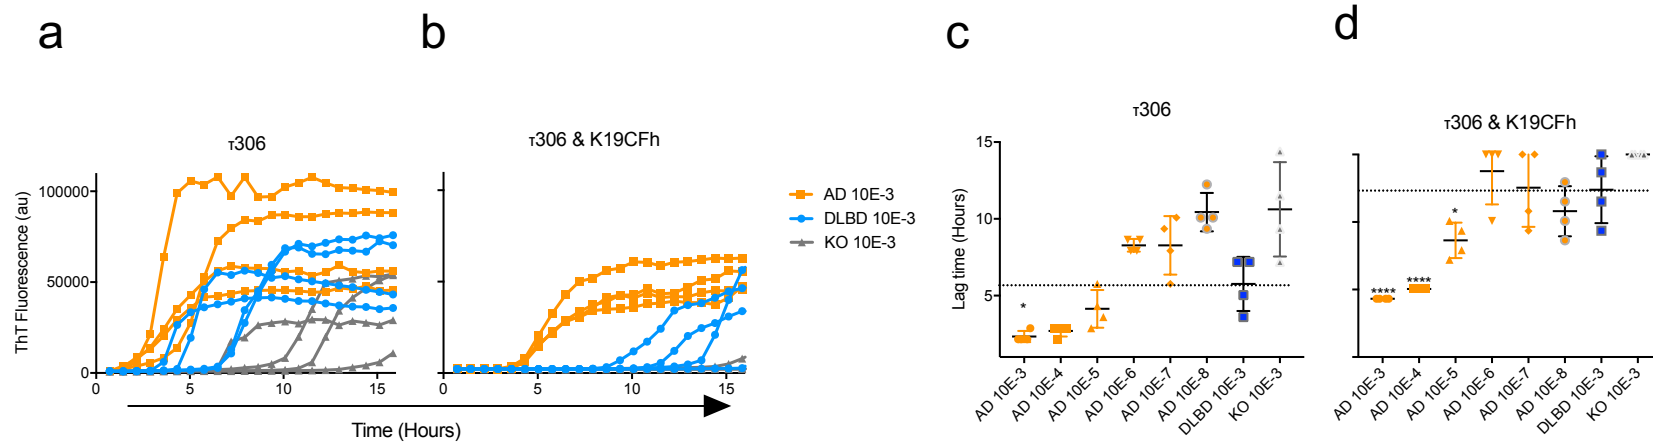

### Online Resource Fig 2. Comparison of $\tau$ 306 alone or mixed with K19CFh as substrates for detection of AD-associated tau seeding activity.

**a.**  $\tau$ 306 alone was tested as a substrate for RT-QuIC reactions seeded with AD or DLBD brain homogenates in a 96 well plate. Mouse tau KO brain homogenate was used as a tau-free control. AD brain homogenates modestly accelerated amyloid formation. **b.** Inclusion of K19CFh in a 3:1 stoichiometric ratio with  $\tau$ 306 gave improved discrimination of AD brain homogenate dilutions from DLBD and tau KO brain homogenates. **c.** Lag time analyses showed use of  $\tau$ 306 substrate alone only allowed significant discrimination of  $10^{-3}$  dilutions of AD brain homogenate from DLBD brain homogenate, which lacked histologically detectable tau pathology. **d.** Inclusion of K19CFh with  $\tau$ 306 (3:1 stoichiometry) allowed significant discrimination of  $10^5$   $SD_{50}/mg$  with AD brain homogenate prior to positive ThT fluorescence readings in the presence of DLBD brain homogenate. One way ANOVA,  $F(7,24)=3.36$ ,  $*p<0.01$ ;  $F(7,24)=19.49$ ,  $****p<0.0001$ . For comparative purposes, the assay endpoint is shown as 15 h, and data points shown at 15 h had positive ThT fluorescence values at or greater than 15 h. These data points were assigned a value of 15 for statistical calculations, including mean  $\pm$  S.D.

## Online Resource Fig 3.

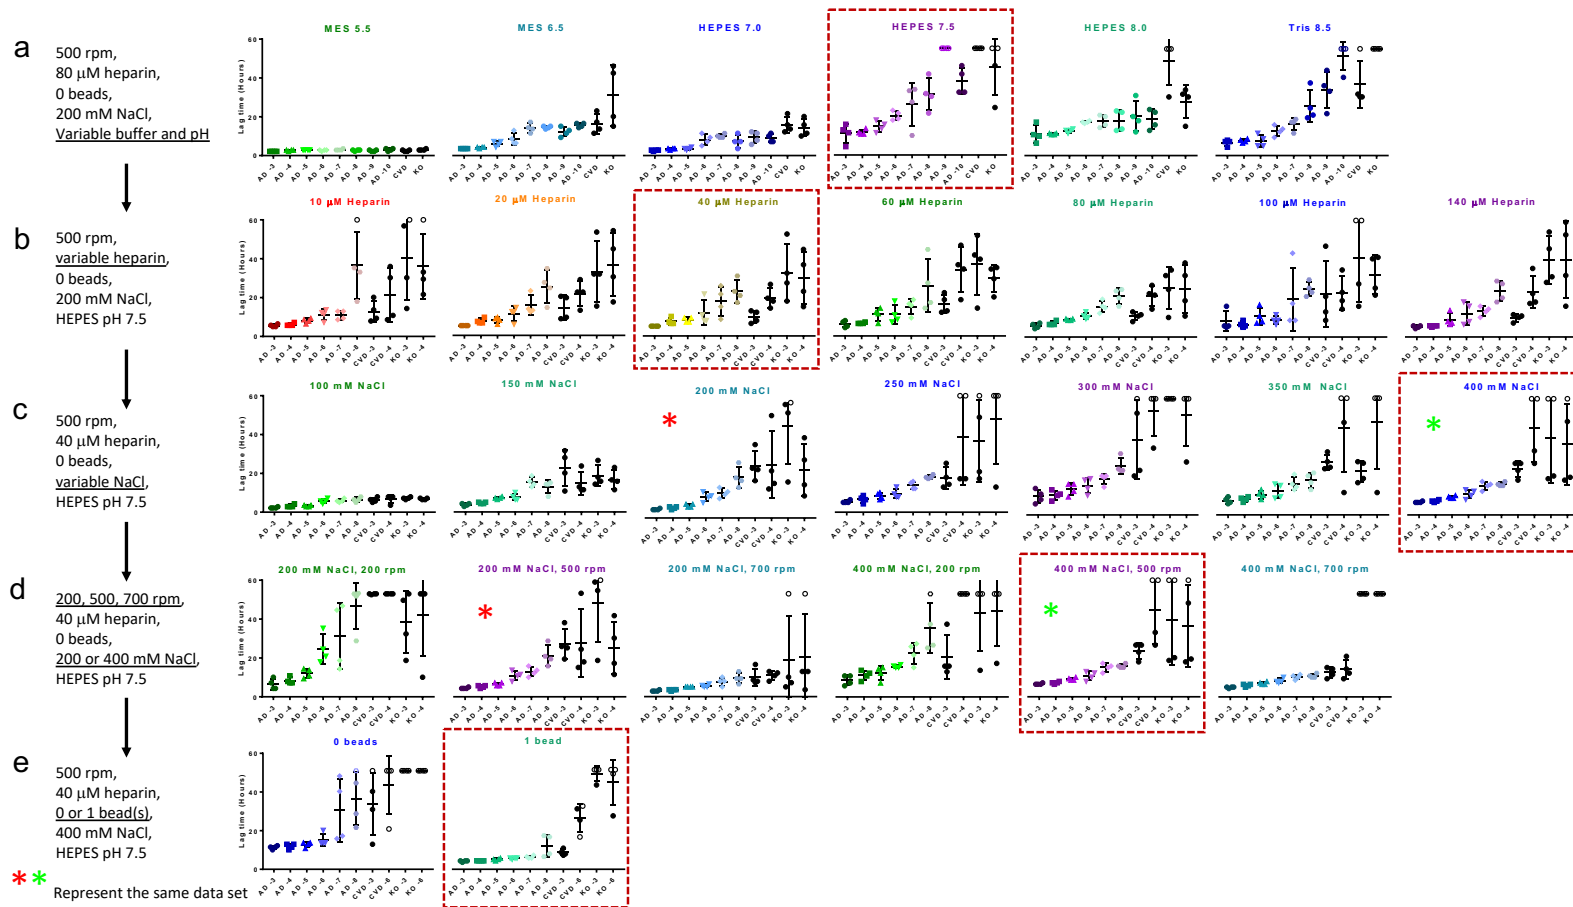

**Online Resource Fig 3. Optimization of AD RT-QuIC assay conditions.** Conditions were optimized using a 1:3 stoichiometric ratio of  $\tau$ 306:K19CFh. Iterative optimizations were carried out in the following order: a) pH, b) heparin concentration, c) salt concentration, d) shaking speed during incubation at 200 mM and 400 mM NaCl, as well as e) the inclusion of one silica bead in the assay. For each variable tested, the final condition selected is indicated with a box. Green and red asterisks indicate the same data sets, shown twice for comparison. Assay endpoints ranged from 51 – 60 hours. Wells that had not yet exceeded threshold fluorescence at the end of the assay are shown as open symbols and included in mean  $\pm$  SD calculations for comparative purposes. Conditions were chosen to optimize selectivity for AD against CVD-seeded wells while delaying spontaneous fibril formation in KO-seeded wells.

Online Resource Figure 4.

a

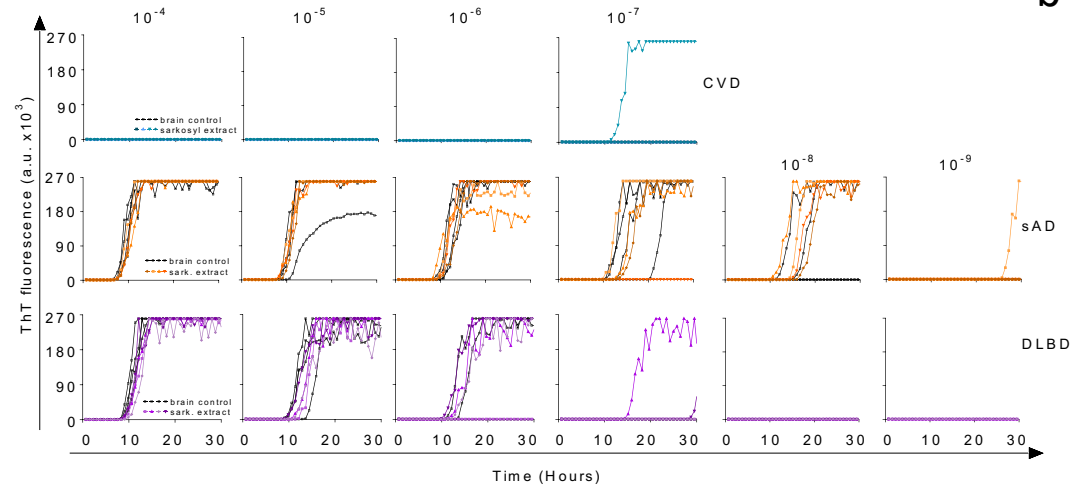

b

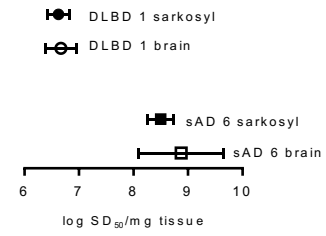

c

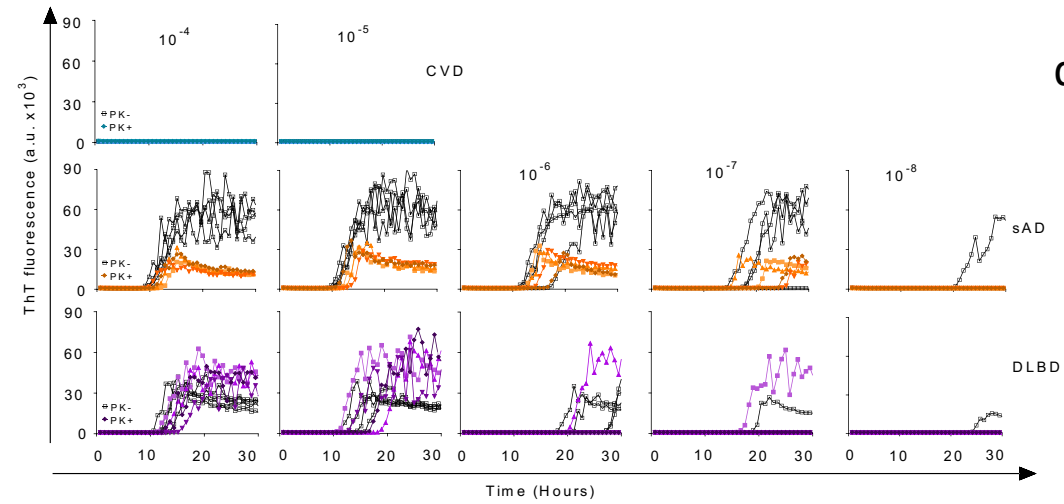

d

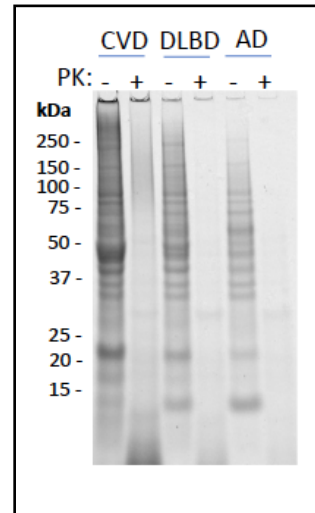

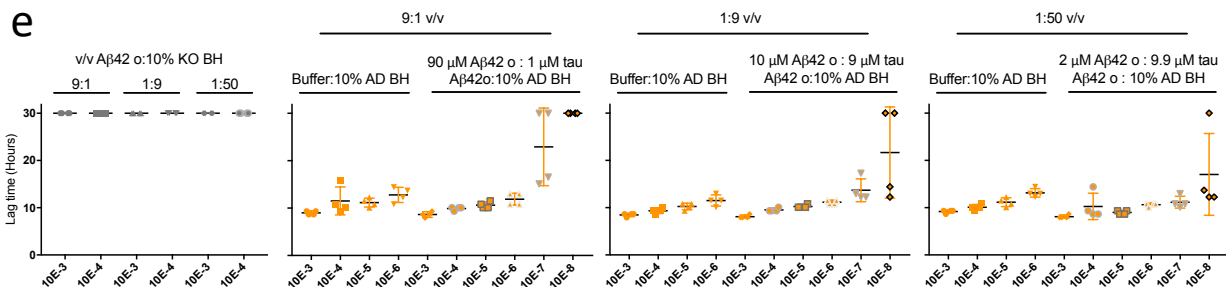

**Online Resource Fig 4. Seeding activity is largely derived from sarkosyl-insoluble, protease resistant tau and is not significantly influenced by Aβ42 oligomers.**

**a.** Brain equivalents of Sarkosyl-insoluble tau were analyzed in parallel to brain homogenates from the matching brain in the AD RT-QuIC. Each curve represents ThT fluorescence from an individual well, run in quadruplicate. **b.** The mean log  $SD_{50}/mg \pm S.E.$  is shown for DLBD and AD brain homogenates (brain) and sarkosyl insoluble extracts (sarkosyl). **c.** CVD non-tauopathy and DLBD and AD brain homogenates were treated with proteinase K prior to analysis by RT-QuIC and compared to non-PK treated brain homogenates by endpoint-dilution. Each curve represents ThT fluorescence from an individual well, run in quadruplicate. **d.** Proteinase-K (PK+) treated and non-treated (PK-) CVD, DLBD, and AD brain homogenates used for RT-QuIC analyses were run on an SDS-PAGE gel and analyzed by Deep purple total protein stain to confirm PK digestion. **e.** Aβ42 oligomers (Aβ42 o) were mixed at different molar ratios as indicated with mouse tau KO or AD brain homogenate samples and these mixtures were used for dilution analyses in the AD RT-QuIC reactions. Control reactions containing mouse tau KO brain homogenates were matched v/v to the AD brain homogenate samples. Molarity of tau was calculated based on the assumption of  $\sim 10 \mu M$  total tau in an AD brain. Each point indicates the lag time of an individual well with mean  $\pm S.D.$  indicated by the cross hatches and bars. Data points beyond the assay endpoint at 30 h were assigned a value of 30 for comparative purposes. Addition of oligomers did not significantly influence the lag phases of AD brain-seeded fluorescence readings. BH, brain homogenate.



## Online Resource Fig 5.

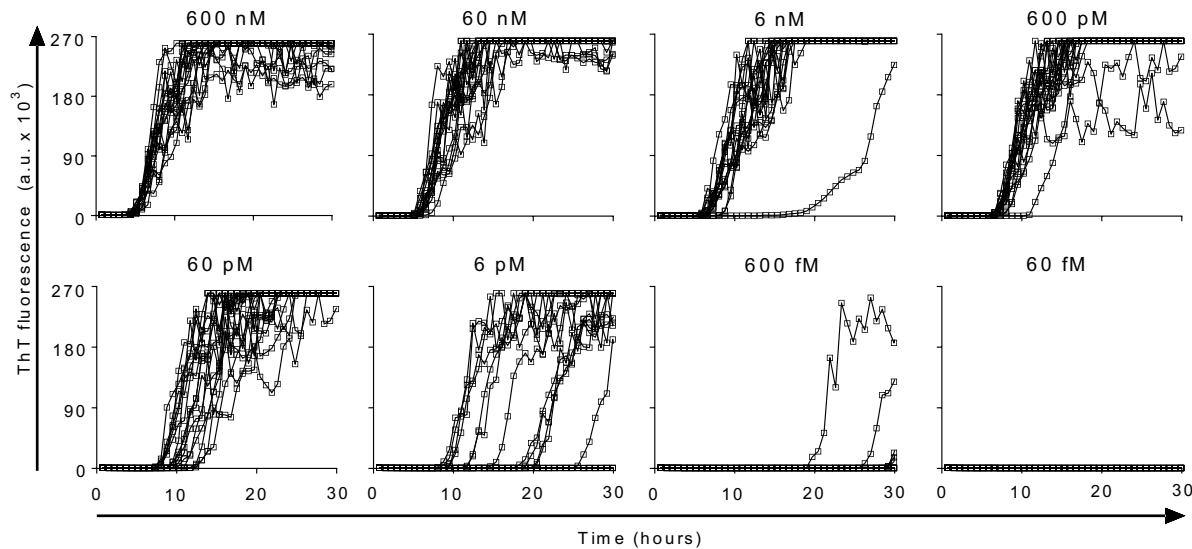

**Online Resource Fig 5. Endpoint dilution of synthetic AD brain-seeded  $\tau$ 306 and K19CFh fibrils in AD RT-QuIC reactions.** Synthetic recombinant  $\tau$ 306 & K19CFh fibrils were collected after 60 h of continuous shaking at 1000 rpm, 37 °C and quantitated using gel analysis against a standard curve of  $\tau$ 306 & K19CFh recombinant protein. Endpoint dilution analysis in the AD RT-QuIC was used to determine the molar analytical sensitivity of the synthetic fibrils. Each panel represents the ThT fluorescence readings of sixteen replicate wells at the designated fibril concentration, analyzed over four individual experiments.
